# Supplementary material
Source: PubMed Central journal article supplement (PMC5225297)

# Supplementary Figure

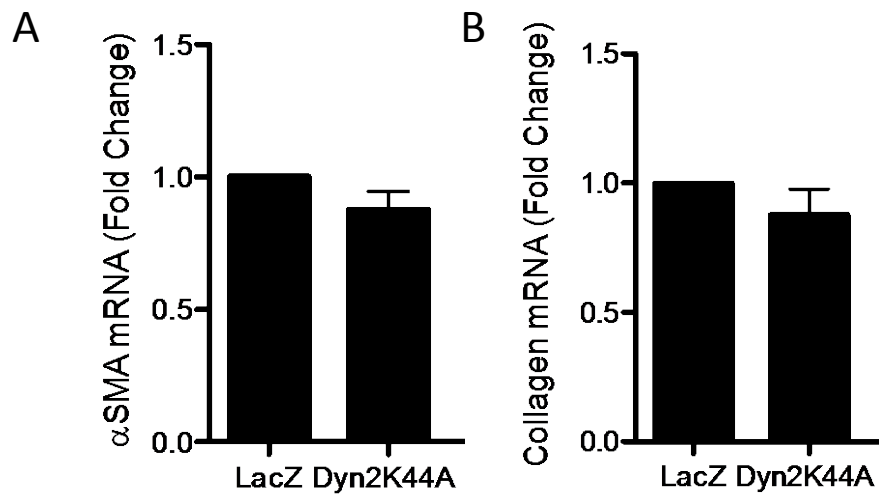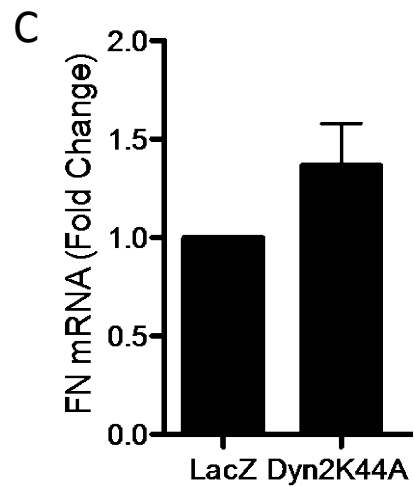

Supplement: mmc1.pdf [file mmc1.pdf]
